# Supplementary material for: Long Noncoding RNA uc001pwg.1 Is Downregulated in Neointima in Arteriovenous Fistulas and Mediates the Function of Endothelial Cells Derived from Pluripotent Stem Cells
Source: Stem Cells Int. 2017 Dec 13;2017:4252974. doi: 10.1155/2017/4252974 (PMC5745761; doi:10.1155/2017/4252974)
Supplement: Supplementary 2 — A versus N up- or downregulated transcripts. [file 4252974.f2.xlsx]

## Sheet: up.A_vs_N
A vs N Fold Change: 1.5 p-value: 0.05 FPKM >= 0.1 in at least one group Column A: transcript_id, the transcript id. Column B: biotype, type of gene, including antisense, .... Column C: strand, transcription direction. Column D: gene_id, the Ensembl gene identifier. Column E: locus, genomic locus. chromosome: start-end. Column F ~ G, FPKM value of each group. Column H: log2(fold change), fold chan…
A vs N up-regulated transcripts
transcript_id	biotype	strand	gene_id	locus	A_FPKM	N_FPKM	log2(fold change)	p_value	q_value	LncRNA_Source	LncRNA_length	relationship	associated_gene_transID	association_gene_acc	association_gene_name	associated_gene_strand	associated_gene_start	associated_gene_end
ENST00000362428	lincRNA	-	ENSG00000264940	chr17:19092977-19093558	2605.87	813.478	1.67959	0.0131	0.751122	Ensembl
ENST00000363120	misc_RNA	+	ENSG00000199990	chr5:140088280-140091096	200.472	0	inf	0.0005	0.243632	Ensembl
ENST00000364558	misc_RNA	+	ENSG00000201428	chr12:112597991-112819896	863.671	11.2571	6.26158	0.00705	0.751122	Ensembl	318	intronic antisense	ENST00000430131	ENST00000430131	HECTD4	-	112597991	112819896
ENST00000364558	misc_RNA	+	ENSG00000201428	chr12:112597991-112819896	863.671	11.2571	6.26158	0.00705	0.751122	Ensembl	318	intronic antisense	ENST00000550722	ENST00000550722	HECTD4	-	112598000	112819896
ENST00000364558	misc_RNA	+	ENSG00000201428	chr12:112597991-112819896	863.671	11.2571	6.26158	0.00705	0.751122	Ensembl	318	intronic antisense	ENST00000550724	ENST00000550724	HECTD4	-	112703736	112819896
ENST00000364558	misc_RNA	+	ENSG00000201428	chr12:112597991-112819896	863.671	11.2571	6.26158	0.00705	0.751122	Ensembl	318	intronic antisense	NM_001109662	NM_001109662	HECTD4	-	112597991	112819896
ENST00000426976	antisense	+	ENSG00000232057	chr2:1792884-2335032	3.55717	0.549294	2.69508	0.00915	0.751122	Ensembl	3403	intronic antisense	ENST00000399157	ENST00000399157	MYT1L	-	1794946	1844551
ENST00000426976	antisense	+	ENSG00000232057	chr2:1792884-2335032	3.55717	0.549294	2.69508	0.00915	0.751122	Ensembl	3403	intronic antisense	ENST00000407844	ENST00000407844	MYT1L	-	1792907	1846658
ENST00000426976	antisense	+	ENSG00000232057	chr2:1792884-2335032	3.55717	0.549294	2.69508	0.00915	0.751122	Ensembl	3403	intronic antisense	NM_001303052	NM_001303052	MYT1L	-	1792884	2335085
ENST00000426976	antisense	+	ENSG00000232057	chr2:1792884-2335032	3.55717	0.549294	2.69508	0.00915	0.751122	Ensembl	3403	intronic antisense	NM_015025	NM_015025	MYT1L	-	1792884	2335085
ENST00000429940	lincRNA	+	ENSG00000185904	chr10:42970938-42990784	1.89814	0	inf	0.0003	0.162421	Ensembl
ENST00000436551	lincRNA	-	ENSG00000234362	chr2:42158738-42160863	4.22526	0	inf	5e-05	0.052548	Ensembl
ENST00000439898	lincRNA	+	ENSG00000230454	chr3:50297734-50300790	2.51932	0.300311	3.0685	0.00785	0.751122	Ensembl	2625	intergenic
ENST00000441075	lincRNA	-	ENSG00000172965	chr2:111953539-112268567	4.02679	0.00113468	11.7931	0.04245	0.751122	Ensembl	704	intergenic
ENST00000441217	lincRNA	+	ENSG00000235499	chr2:74212258-74213470	9.22136	1.74248	2.40384	0.03585	0.751122	Ensembl	390	intergenic
ENST00000452622	lincRNA	+	ENSG00000223855	chr7:560027-564869	1.84436	0.0887538	4.37717	0.0079	0.751122	Ensembl
ENST00000511928	lincRNA	-	ENSG00000250986	chr4:3760474-3765117	2.82106	0.715724	1.97876	0.04055	0.751122	Ensembl	4525	intergenic
ENST00000520085	lincRNA	-	ENSG00000254353	chr5:70328994-70330227	3.46962	0	inf	5e-05	0.052548	Ensembl	707	intergenic
ENST00000523269	lincRNA	+	ENSG00000249669	chr5:148786251-148812398	16.0065	1.61761e-37	126.218	0.00165	0.491324	Ensembl	411	intergenic
ENST00000523602	lincRNA	+	ENSG00000253317	chr8:73108568-73114504	2.33629	0	inf	5e-05	0.052548	Ensembl	798	intergenic
ENST00000533633	processed_transcript	+	ENSG00000152268	chr11:13983913-14295237	25.757	3.84059	2.74557	0.0353	0.751122	Ensembl
ENST00000543097	lincRNA	+	ENSG00000233864	chrY:14774264-14804162	10.8308	0	inf	0.0482	0.751122	Ensembl	398	intergenic
ENST00000565024	lincRNA	-	ENSG00000260377	chr3:182457456-182458636	3.43014	0	inf	5e-05	0.052548	Ensembl	1180	intergenic
ENST00000566733	lincRNA	-	ENSG00000260604	chr6:3905143-3912213	1.81376	0.28053	2.69276	0.0127	0.751122	Ensembl	7070	intergenic
ENST00000578408	sense_intronic	-	ENSG00000265222	chr17:30819539-31205655	1.65885	0	inf	0.01725	0.751122	Ensembl	927	intron sense-overlapping	ENST00000394649	ENST00000394649	MYO1D	-	30819626	31190061
ENST00000578408	sense_intronic	-	ENSG00000265222	chr17:30819539-31205655	1.65885	0	inf	0.01725	0.751122	Ensembl	927	intron sense-overlapping	NM_015194	NM_015194	MYO1D	-	30819539	31204191
ENST00000580476	misc_RNA	+	ENSG00000263426	chr6:28945251-28945547	6.20073	0	inf	0.0001	0.0799985	Ensembl	296	intergenic
ENST00000581458	misc_RNA	+	ENSG00000265735	chr9:8314245-10612723	3997.67	1366.6	1.54857	0.0162	0.751122	Ensembl
ENST00000597346	antisense	-	ENSG00000269821	chr11:2465913-2882798	2.33794	0.680307	1.78098	0.0347	0.751122	Ensembl	91667	natural antisense	NM_000218	NM_000218	KCNQ1	+	2466220	2870340
ENST00000597346	antisense	-	ENSG00000269821	chr11:2465913-2882798	2.33794	0.680307	1.78098	0.0347	0.751122	Ensembl	91667	natural antisense	NM_181798	NM_181798	KCNQ1	+	2482683	2870340
ENST00000602625	lincRNA	+	ENSG00000269979	chr9:125086886-125087594	1.71856	0	inf	0.0001	0.0799985	Ensembl	708	intergenic
ENST00000604724	lincRNA	-	ENSG00000270547	chr9:13406378-13433052	1.6539	0	inf	0.00345	0.751122	Ensembl
ENST00000605459	lincRNA	-	ENSG00000270547	chr9:13406378-13433052	8.63172	0	inf	0.03835	0.751122	Ensembl	395	intergenic
ENST00000607307	lincRNA	+	ENSG00000272455	chr1:1344475-1345998	1.91859	0	inf	5e-05	0.052548	Ensembl	1523	intergenic
ENST00000607518	lincRNA	+	ENSG00000272209	chr6:13825662-13826805	2.91134	0	inf	0.0498	0.751122	Ensembl	1143	intergenic
ENST00000608521	processed_transcript	-	ENSG00000227195	chr20:26167555-26232162	31.6607	2.13601	3.8897	0.002	0.561246	Ensembl	553	intergenic
ENST00000610128	lincRNA	+	ENSG00000273033	chr3:122605359-122611262	1.48568	5.92315e-05	14.6144	0.0445	0.751122	Ensembl	5456	intergenic
NR_002728	long_noncoding	-	KCNQ1OT1	chr11:2465913-2882798	2.33669	0.677148	1.78692	0.03225	0.751122	RefSeq	91671	natural antisense	NM_000218	NM_000218	KCNQ1	+	2466220	2870340
NR_002728	long_noncoding	-	KCNQ1OT1	chr11:2465913-2882798	2.33669	0.677148	1.78692	0.03225	0.751122	RefSeq	91671	natural antisense	NM_181798	NM_181798	KCNQ1	+	2482683	2870340
NR_047524	long_noncoding	+	LINC01128	chr1:762970-794826	1.66715	0.000209047	12.9613	0.03545	0.751122	RefSeq	6439	intergenic
NR_117090	long_noncoding	-	CD24	chrY:21034386-21239432	10.4675	1.37017	2.93349	0.0327	0.751122	RefSeq	2336	exon sense-overlapping	NM_001291737	NM_001291737	CD24	-	21152525	21154962
NR_117090	long_noncoding	-	CD24	chrY:21034386-21239432	10.4675	1.37017	2.93349	0.0327	0.751122	RefSeq	2336	exon sense-overlapping	NM_001291738	NM_001291738	CD24	-	21152525	21438350
NR_117090	long_noncoding	-	CD24	chrY:21034386-21239432	10.4675	1.37017	2.93349	0.0327	0.751122	RefSeq	2336	exon sense-overlapping	NM_001291739	NM_001291739	CD24	-	21152525	21154528
NR_117090	long_noncoding	-	CD24	chrY:21034386-21239432	10.4675	1.37017	2.93349	0.0327	0.751122	RefSeq	2336	exon sense-overlapping	NM_013230	NM_013230	CD24	-	21152525	21154800
TCONS_00001651	long_noncoding	-	XLOC_000992	chr1:121484056-121485433	23.1835	3.06905	2.91724	0.00395	0.751122	TCONS	1038	intergenic
TCONS_00013381	long_noncoding	+	XLOC_006016	chr7:25878710-25888417	2.47169	0	inf	5e-05	0.052548	TCONS	2334	intergenic
TCONS_l2_00000272	long_noncoding	+	XLOC_l2_000196	chr1:48549624-48648100	4.914	0.158796	4.95165	0.0088	0.751122	TUCP	2022	intron sense-overlapping	ENST00000601108	ENST00000601108	AL109659.1	+	48569305	48569878
TCONS_l2_00005321	long_noncoding	+	XLOC_l2_002349	chr11:65184125-65213011	31.0193	8.31743e-77	257.687	0.01645	0.751122	TUCP	1987	intergenic
uc002czn.3	long_noncoding	+	AK057657	chr16:9185504-9215497	6.58522	7.92681e-05	16.3421	0.0341	0.751122	UCSC_knowngene	3758	intron sense-overlapping	NM_014117	NM_014117	C16orf72	+	9185536	9213555
uc002ubv.4	long_noncoding	-	BC073897	chr2:162164548-162268228	54.8158	0.923135	5.89191	0.02885	0.751122	UCSC_knowngene	620	intronic antisense	ENST00000437630	ENST00000437630	PSMD14	+	162165110	162226630
uc002ubv.4	long_noncoding	-	BC073897	chr2:162164548-162268228	54.8158	0.923135	5.89191	0.02885	0.751122	UCSC_knowngene	620	intronic antisense	NM_005805	NM_005805	PSMD14	+	162164785	162268228

## Sheet: dn.A_vs_N
A vs N Fold Change: 1.5 p-value: 0.05 FPKM >= 0.1 in at least one group Column A: transcript_id, the transcript id. Column B: biotype, type of gene, including antisense, .... Column C: strand, transcription direction. Column D: gene_id, the Ensembl gene identifier. Column E: locus, genomic locus. chromosome: start-end. Column F ~ G, FPKM value of each group. Column H: log2(fold change), fold chan…
A vs N down-regulated transcripts
transcript_id	biotype	strand	gene_id	locus	A_FPKM	N_FPKM	log2(fold change)	p_value	q_value	LncRNA_Source	LncRNA_length	relationship	associated_gene_transID	association_gene_acc	association_gene_name	associated_gene_strand	associated_gene_start	associated_gene_end
ENST00000413525	lincRNA	+	ENSG00000232606	chr2:145141647-145337001	0	1.95381	-inf	0.044	0.751122	Ensembl	362	intergenic
ENST00000415249	lincRNA	-	ENSG00000223665	chr7:91268161-91272827	0	1.48398	-inf	0.0016	0.490048	Ensembl	536	intergenic
ENST00000420825	lincRNA	+	ENSG00000231496	chr10:11002113-11012779	0	5.55116	-inf	0.0001	0.0799985	Ensembl	537	intergenic
ENST00000421310	lincRNA	+	ENSG00000236673	chr6:132223102-132241705	0	2.55619	-inf	0.0003	0.162421	Ensembl	601	intergenic
ENST00000421866	antisense	-	ENSG00000233875	chr1:154540256-154552502	0.111193	5.5401	-5.63878	0.0272	0.751122	Ensembl	321	natural antisense	NM_000748	NM_000748	CHRNB2	+	154540256	154552353
ENST00000426187	lincRNA	-	ENSG00000228569	chr7:156225216-156228527	0	1.99849	-inf	0.0016	0.490048	Ensembl	432	intergenic
ENST00000426504	lincRNA	+	ENSG00000234190	chr1:147249699-147261065	0	5.59943	-inf	5e-05	0.052548	Ensembl	480	intergenic
ENST00000428504	lincRNA	-	ENSG00000228327	chr1:694411-714006	5.39067	13.9025	-1.3668	0.046	0.751122	Ensembl
ENST00000429053	antisense	-	ENSG00000228614	chr6:53655672-53659072	0	1.70817	-inf	0.0016	0.490048	Ensembl	483	bidirectional	ENST00000370882	ENST00000370882	LRRC1	+	53659887	53748943
ENST00000429053	antisense	-	ENSG00000228614	chr6:53655672-53659072	0	1.70817	-inf	0.0016	0.490048	Ensembl	483	bidirectional	NM_018214	NM_018214	LRRC1	+	53659777	53788919
ENST00000433210	lincRNA	+	ENSG00000231620	chr21:20673929-20676056	0	2.37858	-inf	0.0001	0.0799985	Ensembl	636	intergenic
ENST00000435612	lincRNA	-	ENSG00000233085	chr6:169686628-169689311	0	1.72784	-inf	0.0014	0.471022	Ensembl	479	intergenic
ENST00000435617	lincRNA	-	ENSG00000234689	chr13:48479463-48481492	0	10.3594	-inf	0.00055	0.249826	Ensembl	215	intergenic
ENST00000435984	lincRNA	+	ENSG00000204792	chr2:75136257-75165545	0	4.15353	-inf	0.0001	0.0799985	Ensembl	565	intergenic
ENST00000436974	lincRNA	-	ENSG00000226375	chr1:173143438-173144642	0	2.95377	-inf	0.0002	0.126115	Ensembl	690	intergenic
ENST00000440341	lincRNA	+	ENSG00000235610	chr2:224370193-224375651	0	1.82983	-inf	0.0001	0.0799985	Ensembl	787	intergenic
ENST00000447950	lincRNA	+	ENSG00000225706	chr9:8314245-10612723	1.45461e-138	1.55992	-458.527	0.012	0.751122	Ensembl
ENST00000448241	lincRNA	+	ENSG00000228950	chr2:20650802-20652708	0	5.94455	-inf	0.00065	0.256172	Ensembl	308	intergenic
ENST00000449362	lincRNA	+	ENSG00000235293	chr2:236086539-236087549	0	2.82191	-inf	0.00025	0.14105	Ensembl	663	intergenic
ENST00000454735	lincRNA	+	ENSG00000232053	chr7:135777672-136122174	0	3.82159	-inf	0.0002	0.126115	Ensembl	485	intergenic
ENST00000457672	lincRNA	+	ENSG00000233528	chr13:87564172-87589271	0	3.61662	-inf	0.00025	0.14105	Ensembl	505	intergenic
ENST00000504531	lincRNA	-	ENSG00000249395	chr8:76135351-76236976	0.0266329	2.75749	-6.694	0.03585	0.751122	Ensembl
ENST00000506892	lincRNA	-	ENSG00000251387	chr5:139152112-139155057	0	1.78001	-inf	0.00085	0.312049	Ensembl	553	intergenic
ENST00000520443	antisense	-	ENSG00000253965	chr5:139728068-139737379	0	2.39521	-inf	0.00065	0.256172	Ensembl	570	intergenic
ENST00000520590	antisense	+	ENSG00000170919	chr13:45911007-45965872	6.8307e-24	1.72467	-77.7406	0.00185	0.533108	Ensembl	873	bidirectional	ENST00000309246	ENST00000309246	TPT1	-	45912319	45915221
ENST00000520590	antisense	+	ENSG00000170919	chr13:45911007-45965872	6.8307e-24	1.72467	-77.7406	0.00185	0.533108	Ensembl	873	bidirectional	ENST00000379055	ENST00000379055	TPT1	-	45911436	45915293
ENST00000520590	antisense	+	ENSG00000170919	chr13:45911007-45965872	6.8307e-24	1.72467	-77.7406	0.00185	0.533108	Ensembl	873	bidirectional	ENST00000379060	ENST00000379060	TPT1	-	45911332	45915257
ENST00000520590	antisense	+	ENSG00000170919	chr13:45911007-45965872	6.8307e-24	1.72467	-77.7406	0.00185	0.533108	Ensembl	873	bidirectional	ENST00000527226	ENST00000527226	TPT1	-	45912821	45915293
ENST00000520590	antisense	+	ENSG00000170919	chr13:45911007-45965872	6.8307e-24	1.72467	-77.7406	0.00185	0.533108	Ensembl	873	bidirectional	NM_001286272	NM_001286272	TPT1	-	45907605	45915419
ENST00000520590	antisense	+	ENSG00000170919	chr13:45911007-45965872	6.8307e-24	1.72467	-77.7406	0.00185	0.533108	Ensembl	873	bidirectional	NM_001286273	NM_001286273	TPT1	-	45907605	45915419
ENST00000520590	antisense	+	ENSG00000170919	chr13:45911007-45965872	6.8307e-24	1.72467	-77.7406	0.00185	0.533108	Ensembl	873	bidirectional	NM_003295	NM_003295	TPT1	-	45907605	45915419
ENST00000523862	lincRNA	-	ENSG00000253105	chr8:97384092-97399666	19.7834	57.966	-1.55091	0.01755	0.751122	Ensembl
ENST00000524134	antisense	-	ENSG00000253796	chr8:109907257-110075646	0	2.54054	-inf	0.0004	0.20615	Ensembl	486	intergenic
ENST00000524707	lincRNA	+	ENSG00000254606	chr11:28373653-28548588	0.0323397	1.70532	-5.72059	0.03155	0.751122	Ensembl	747	intergenic
ENST00000529965	antisense	-	ENSG00000255145	chr9:102648607-102668883	0.0489363	4.72921	-6.59455	0.0277	0.751122	Ensembl
ENST00000549669	lincRNA	+	ENSG00000257787	chr12:91203052-91204457	0	2.33759	-inf	0.0001	0.0799985	Ensembl	901	intergenic
ENST00000551075	lincRNA	+	ENSG00000257863	chr12:92295233-92299963	0	2.21531	-inf	5e-05	0.052548	Ensembl	1011	intergenic
ENST00000556869	lincRNA	+	ENSG00000258700	chr14:46410145-46971103	0	2.77573	-inf	0.00055	0.249826	Ensembl
ENST00000557908	antisense	-	ENSG00000259416	chr15:86298171-86301955	0	1.86481	-inf	0.00025	0.14105	Ensembl	855	intergenic
ENST00000565152	antisense	+	ENSG00000260060	chr16:31207451-31208284	3.45742	13.8911	-2.00639	0.03195	0.751122	Ensembl	833	intergenic
ENST00000568248	lincRNA	-	ENSG00000259820	chr8:135804262-135810515	1.4214	5.20992	-1.87395	0.01005	0.751122	Ensembl	6253	intergenic
ENST00000568384	lincRNA	-	ENSG00000260633	chr3:134066129-134068075	1.54699	7.18187	-2.2149	0.01665	0.751122	Ensembl	1946	intergenic
ENST00000568862	lincRNA	+	ENSG00000260977	chr2:47004921-47007384	0.614129	2.0556	-1.74294	0.04155	0.751122	Ensembl	2463	intergenic
ENST00000577988	lincRNA	+	ENSG00000265185	chr17:18965224-18965807	29.9732	169.805	-2.50214	0.0208	0.751122	Ensembl
ENST00000584742	misc_RNA	+	ENSG00000263905	chr20:3074860-3075153	0	1.85428	-inf	0.0039	0.751122	Ensembl	293	intergenic
ENST00000590528	antisense	-	ENSG00000267670	chr19:14138959-14142369	0	1.94153	-inf	0.00085	0.312049	Ensembl	518	natural antisense	NM_001311197	NM_001311197	RLN3	+	14138959	14142370
ENST00000590528	antisense	-	ENSG00000267670	chr19:14138959-14142369	0	1.94153	-inf	0.00085	0.312049	Ensembl	518	natural antisense	NM_080864	NM_080864	RLN3	+	14138959	14142370
ENST00000590579	lincRNA	-	ENSG00000267421	chr19:57047524-57049944	0	3.05776	-inf	0.00155	0.490048	Ensembl	326	bidirectional	NM_001308440	NM_001308440	ZFP28	+	57050316	57064504
ENST00000590579	lincRNA	-	ENSG00000267421	chr19:57047524-57049944	0	3.05776	-inf	0.00155	0.490048	Ensembl	326	bidirectional	NM_020828	NM_020828	ZFP28	+	57050316	57068170
ENST00000605056	lincRNA	+	ENSG00000270210	chr2:28648811-28649586	3.50702	18.174	-2.37356	0.0188	0.751122	Ensembl	775	intergenic
ENST00000606222	lincRNA	-	ENSG00000249781	chr5:9621488-9903938	0	1.514	-inf	0.00245	0.643713	Ensembl	429	intergenic
ENST00000606938	lincRNA	+	ENSG00000272198	chr1:181060244-181062035	1.22014	4.51326	-1.88713	0.04005	0.751122	Ensembl	1791	intergenic
ENST00000607190	lincRNA	+	ENSG00000271991	chr2:20101785-20102330	0	2.54033	-inf	0.00065	0.256172	Ensembl	545	bidirectional	ENST00000402414	ENST00000402414	TTC32	-	20096403	20101717
ENST00000607190	lincRNA	+	ENSG00000271991	chr2:20101785-20102330	0	2.54033	-inf	0.00065	0.256172	Ensembl	545	bidirectional	ENST00000431392	ENST00000431392	TTC32	-	20097629	20101402
ENST00000607190	lincRNA	+	ENSG00000271991	chr2:20101785-20102330	0	2.54033	-inf	0.00065	0.256172	Ensembl	545	bidirectional	NM_001008237	NM_001008237	TTC32	-	20096513	20101744
ENST00000607700	lincRNA	+	ENSG00000271732	chr1:16943885-16944224	0	13.0173	-inf	5e-05	0.052548	Ensembl	339	intergenic
ENST00000608422	lincRNA	-	ENSG00000272866	chr9:5351795-5352410	0	2.79236	-inf	0.0002	0.126115	Ensembl	615	intergenic
ENST00000609066	lincRNA	-	ENSG00000228309	chr1:185527503-185597659	0	2.94726	-inf	0.00015	0.105788	Ensembl	488	intergenic
NR_109926	long_noncoding	+	LOC101928398	chr21:40229462-40230785	0	1.95798	-inf	0.0001	0.0799985	RefSeq	1053	intergenic
TCONS_00001017	long_noncoding	+	XLOC_000282	chr1:89500493-89501302	0	5.14781	-inf	0.0002	0.126115	TCONS	396	intergenic
TCONS_00001500	long_noncoding	-	XLOC_000843	chr1:56611392-56621429	0.101822	2.15647	-4.40455	0.0442	0.751122	TCONS	412	intergenic
TCONS_00003913	long_noncoding	+	XLOC_001718	chr2:157644302-157722240	0	1.66287	-inf	5e-05	0.052548	TCONS	1755	intergenic
TCONS_00006900	long_noncoding	+	XLOC_002721	chr3:83433606-83486867	0	5.29498	-inf	0.00025	0.14105	TCONS	502	intergenic
TCONS_00008726	long_noncoding	-	XLOC_004234	chr4:191028241-191030032	0	8.94345	-inf	0.00025	0.14105	TCONS	301	intergenic
TCONS_00009206	long_noncoding	-	XLOC_004229	chr4:190200224-190201334	0	2.94731	-inf	0.00015	0.105788	TCONS	490	intergenic
TCONS_00009989	long_noncoding	+	XLOC_004415	chr5:67944451-67951024	0	2.16287	-inf	0.00015	0.105787	TCONS	619	intergenic
TCONS_00010217	long_noncoding	+	XLOC_004685	chr5:180296861-180298360	0	4.40849	-inf	0.0002	0.126115	TCONS	508	intergenic
TCONS_00010352	long_noncoding	-	XLOC_004841	chr5:60617325-60627804	0	3.82151	-inf	0.00035	0.183918	TCONS	487	bidirectional	NM_020928	NM_020928	ZSWIM6	+	60628099	60841999
TCONS_00016126	long_noncoding	+	XLOC_007511	chr9:110570349-110574195	0.328255	4.86766	-3.89034	0.0465	0.751122	TCONS	224	intergenic
TCONS_00017347	long_noncoding	-	XLOC_008190	chrX:75364972-75368266	0	2.69559	-inf	0.0007	0.267995	TCONS	412	intergenic
TCONS_00020857	long_noncoding	-	XLOC_010140	chr12:82532345-82537291	0	1.85732	-inf	0.0036	0.751122	TCONS	376	intergenic
TCONS_00022514	long_noncoding	+	XLOC_010838	chr14:56512565-56515401	0	4.89781	-inf	0.00065	0.256172	TCONS	348	intergenic
TCONS_00022738	long_noncoding	-	XLOC_011014	chr14:48702993-48704781	0	1.9938	-inf	0.00055	0.249826	TCONS	585	intergenic
TCONS_00023349	long_noncoding	+	XLOC_011211	chr15:36731172-36777324	0	6.36448	-inf	0.00015	0.105788	TCONS	393	intergenic
TCONS_00024632	long_noncoding	-	XLOC_011921	chr16:32334098-32335381	0	7.79974	-inf	5e-05	0.052548	TCONS	403	intergenic
TCONS_00026420	long_noncoding	-	XLOC_012767	chr18:11159317-11159698	0	4.34224	-inf	0.0016	0.490048	TCONS	271	intergenic
TCONS_00027283	long_noncoding	-	XLOC_013285	chr19:28477698-28491270	0	1.53542	-inf	0.00015	0.105788	TCONS	1012	intergenic
TCONS_00028341	long_noncoding	-	XLOC_013691	chr20:23301590-23305688	0	4.80849	-inf	0.00065	0.256172	TCONS	353	intergenic
TCONS_00029709	long_noncoding	-	XLOC_014393	chr22:45057491-45063703	0	3.36774	-inf	0.00055	0.249826	TCONS	401	bidirectional	NM_001017528	NM_001017528	PRR5	+	45064426	45133561
TCONS_00029709	long_noncoding	-	XLOC_014393	chr22:45057491-45063703	0	3.36774	-inf	0.00055	0.249826	TCONS	401	bidirectional	NM_001017529	NM_001017529	PRR5	+	45064426	45133561
uc001pwg.1	long_noncoding	-	MCAM	chr11:119179240-119192231	0.000128705	57.9149	-18.7795	0.00695	0.751122	UCSC_knowngene	441	exon sense-overlapping	ENST00000392814	ENST00000392814	MCAM	-	119179695	119184795
uc001pwg.1	long_noncoding	-	MCAM	chr11:119179240-119192231	0.000128705	57.9149	-18.7795	0.00695	0.751122	UCSC_knowngene	441	exon sense-overlapping	NM_006500	NM_006500	MCAM	-	119179233	119187840
uc002bmd.3	long_noncoding	-	AK094929	chr15:88402981-88405586	1.9796	8.29509	-2.06705	0.03835	0.751122	UCSC_knowngene	2606	intergenic
uc003gsm.1	long_noncoding	+	AK093205	chr4:33777968-34041515	0	1.54293	-inf	5e-05	0.052548	UCSC_knowngene	1979	intergenic
uc003pyw.1	long_noncoding	-	BC022047	chr6:122757933-122760367	1.97643	6.96	-1.81619	0.0058	0.751122	UCSC_knowngene	2435	intergenic
uc003vic.1	long_noncoding	-	DQ656011	chr7:115849285-116148595	0	21.4411	-inf	0.0459	0.751122	UCSC_knowngene	174	intergenic
uc004ags.1	long_noncoding	+	AK130904	chr9:71150805-71155783	1.14068	6.78018	-2.57142	0.04485	0.751122	UCSC_knowngene	3865	natural antisense	NM_153237	NM_153237	TMEM252	-	71151497	71155783
uc009zpi.1	long_noncoding	+	LRP1	chr12:57482676-57607134	8.72831e-68	17.513	-226.896	0.0433	0.751122	UCSC_knowngene	219	exon sense-overlapping	NM_002332	NM_002332	LRP1	+	57522281	57607125
uc021vqi.1	long_noncoding	+	ZEB2_AS1_1	chr2:145141647-145337001	0	74.225	-inf	0.03685	0.751122	UCSC_knowngene	128	intronic antisense	ENST00000444559	ENST00000444559	ZEB2	-	145187477	145277966
uc021vqi.1	long_noncoding	+	ZEB2_AS1_1	chr2:145141647-145337001	0	74.225	-inf	0.03685	0.751122	UCSC_knowngene	128	intronic antisense	NM_001171653	NM_001171653	ZEB2	-	145141941	145277958
uc021vqi.1	long_noncoding	+	ZEB2_AS1_1	chr2:145141647-145337001	0	74.225	-inf	0.03685	0.751122	UCSC_knowngene	128	intronic antisense	NM_014795	NM_014795	ZEB2	-	145141941	145277958
